# Supplementary material
Source: PubMed Central journal article supplement (PMC6141171)
Supplement: jciinsight-3-121882-s128.pdf [file jciinsight-3-121882-s128.pdf]

## Supplemental Information

**Supplemental Table 1.** *Primer sequences for real-time PCR*

| Gene          | Primer sequences                       |                                       |
|---------------|----------------------------------------|---------------------------------------|
| <i>Mouse</i>  |                                        |                                       |
| CCL11         | Forward:5'-TGCAGAGCTCCACAGCGCTT-3'     | Reverse:5'-GGGTGAGCCAGCACCTGGGA-3'    |
| CCL24         | Forward:5'-ACCTCCAGAACATGGCGGGC-3'     | Reverse:5'-AGATGCAACACGCGCAGGCT-3'    |
| CXCL1         | Forward:5'-TGCACCCAAACCGAAGTCAT-3'     | Reverse:5'-CAAGGGAGCTTCAGGGTCAAG-3'   |
| CXCL2         | Forward:5'-GCGCTGTCAATGCCTGAAG-3'      | Reverse:5'-CGTCACACTCAAGCTCTGGAT-3'   |
| CXCL10        | Forward:5'-GCTGCAACTGCATCCATATC-3'     | Reverse:5'-TTTCATCGTGGCAATGATCT-3'    |
| GAPDH         | Forward:5'-GTCGGTGTGAACGGATTG-3'       | Reverse:5'GTCGTTGATGGCAACAATCTC-3'    |
| GOB5          | Forward:5'-CTGTCTTCCTCTTGATCCTCCA-3'   | Reverse:5'-CGTGGTCTATGGCGATGACG-3'    |
| IFN- $\alpha$ | Forward:5'-CCATCCCTGTCTGAGTG-3'        | Reverse:5'-CCATGCAGCAGATGAGTCCTT-3'   |
| IFN- $\beta$  | Forward:5'-CAGCCCTCTCCATCAACTATAAG-3'  | Reverse:5'-CCTGTAGGTGAGGTTGATCTTTC-3' |
| IFN- $\gamma$ | Forward:5'-ACGCTACACACTGCATCTTGG-3'    | Reverse:5'-GTCACCATCCTTTTGCCAGTTC-3'  |
| IL12b         | Forward:5'-CTCCTGGTTTGCCATCGTTT-3'     | Reverse:5'-GGGAGTCCAGTCCACCTCTA-3'    |
| IL13          | Forward:5'-CCTGGCTCTTGCTTGCCCTT-3'     | Reverse:5'-GGTCTTGTGTGATGTTGCTCA-3'   |
| IL17a         | Forward:5'-GCCTGAGAGCTGCCCTTCAC-3'     | Reverse:5'-GGCTGCCTGGCGACAATCG-3'     |
| IL5           | Forward:5'-CTCTGTTGACAAGCAATGAGACG-3'  | Reverse:5'-TCTTCAGTATGTCTAGCCCCTG-3'  |
| IL6           | Forward:5'-TTGGTCCTTAGCCACTCCTTC-3'    | Reverse:5'-TAGTCCTTCTACCCCAATTTCC-3'  |
| MCP1          | Forward:5'-GCTCTCTTCTCCACCAC-3'        | Reverse:5'-GCGTAACTGCATCTGGCT-3'      |
| Muc5ac        | Forward:5'-AAAGACACCAGTAGTCACTCAGCAA-3 | Reverse:5'-CTGGGAAGTCAGTGTCAAACC-3'   |
| Muc5b         | Forward:5'-GAGCAGTGGCTATGTGAAAATCAG-3' | Reverse:5'-CAGGGCGCTGTCTTCTTCAT-3'    |
| TNF-a         | Forward:5'-GCAGGTTCTGTCCCTTTCAC-3'     | Reverse:5'-GTCGCGGATCATGCTTCTG-3'     |
| <i>Human</i>  |                                        |                                       |
| GAPDH         | Forward:5'-TTCGACAGTCAGCCGCATC-3'      | Reverse:5'-CGACCAAATCCGTTGACTCC-3'    |
| IL17a         | Forward:5'-CAAGACTGAACACCGACTAAGG-3'   | Reverse:5'-CCATTCCTCAGGGCCATTATC-3'   |

Supplementary Table 2. Characteristics of tested patients with EV-D68 or RV-A

| Characteristic                                | EV-D68<br>N=10 | RV-A<br>N=11 |
|-----------------------------------------------|----------------|--------------|
| Age Group, n (%)                              |                |              |
| 0-10 years                                    | 5 (50)         | 4 (36)       |
| 11+ years                                     | 5 (50)         | 7 (64)       |
| Male, n (%)                                   | 5 (50)         | 6 (55)       |
| Race, n (%)                                   |                |              |
| White                                         | 7 (70)         | 8 (73)       |
| African American                              | 2 (20)         | 2 (18)       |
| Other                                         | 1 (10)         | 1 (9)        |
| Inpatient Encounter, n (%)                    | 7 (70)         | 11 (100)     |
| ICU Admission, n (%)                          | 2 (20)         | 2 (18)       |
| Charlson Comorbidity Index,<br>median (range) | 2.5 (0, 8)     | 3 (0, 10)    |
| History of Asthma <sup>a</sup> , n (%)        | 7 (78)         | 6 (75)       |

<sup>a</sup>History of asthma defined as those who received outpatient or inpatient medications for asthma, or who had an asthma ICD-9 code present in their hospital record. Asthma status missing for 1 in EV-D68 group and 3 in RV-A group.
